# Supplementary material for: A Synthetic Polymicrobial Community Biofilm Model Demonstrates Spatial Partitioning, Tolerance to Antimicrobial Treatment, Reduced Metabolism, and Small Colony Variants Typical of Chronic Wound Biofilms
Source: MDPI journal article supplement (doi:10.3390/pathogens12010118), 2023-01-10
Supplement: s1 [file s1]

## Supplementary materials

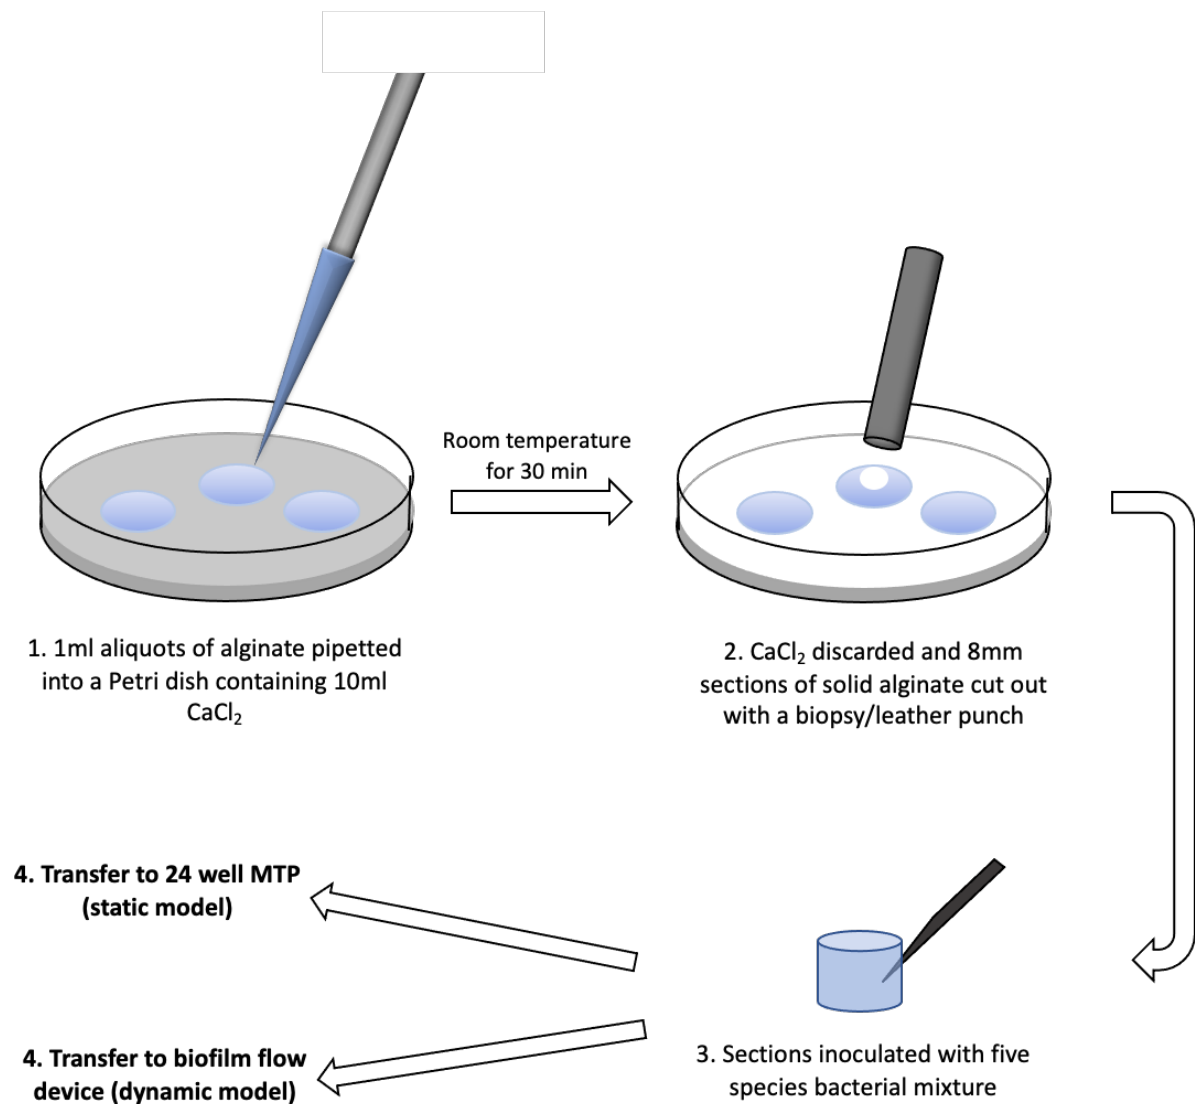

**Figure S1.** Schematic representation of biofilm preparation using an alginate matrix inoculated with bacterial suspension.

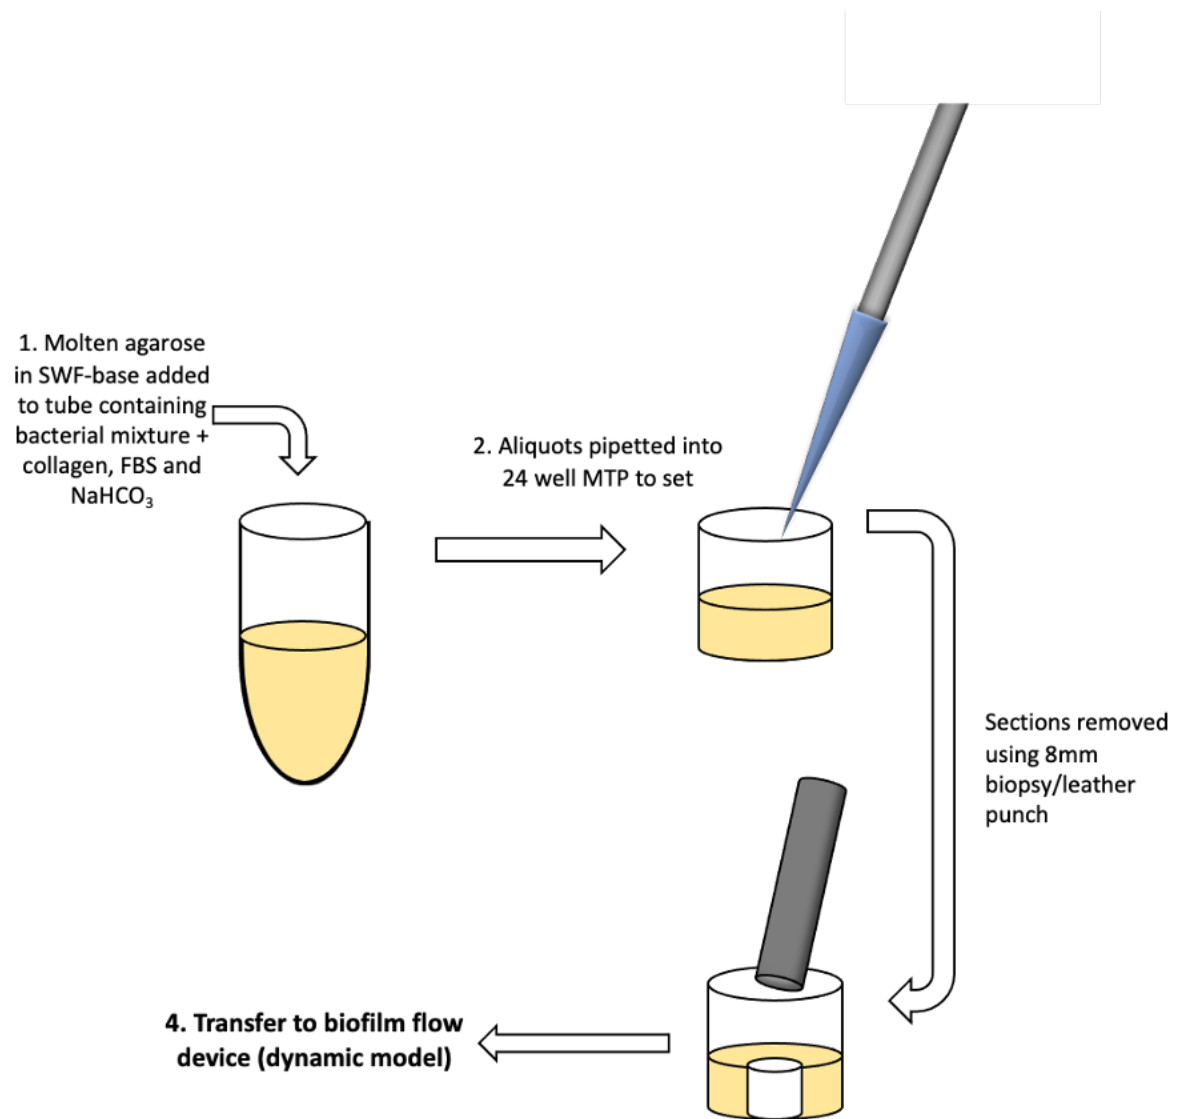

**Figure S2.** Schematic representation of biofilm preparation using an agarose-collagen matrix in which bacteria are embedded.

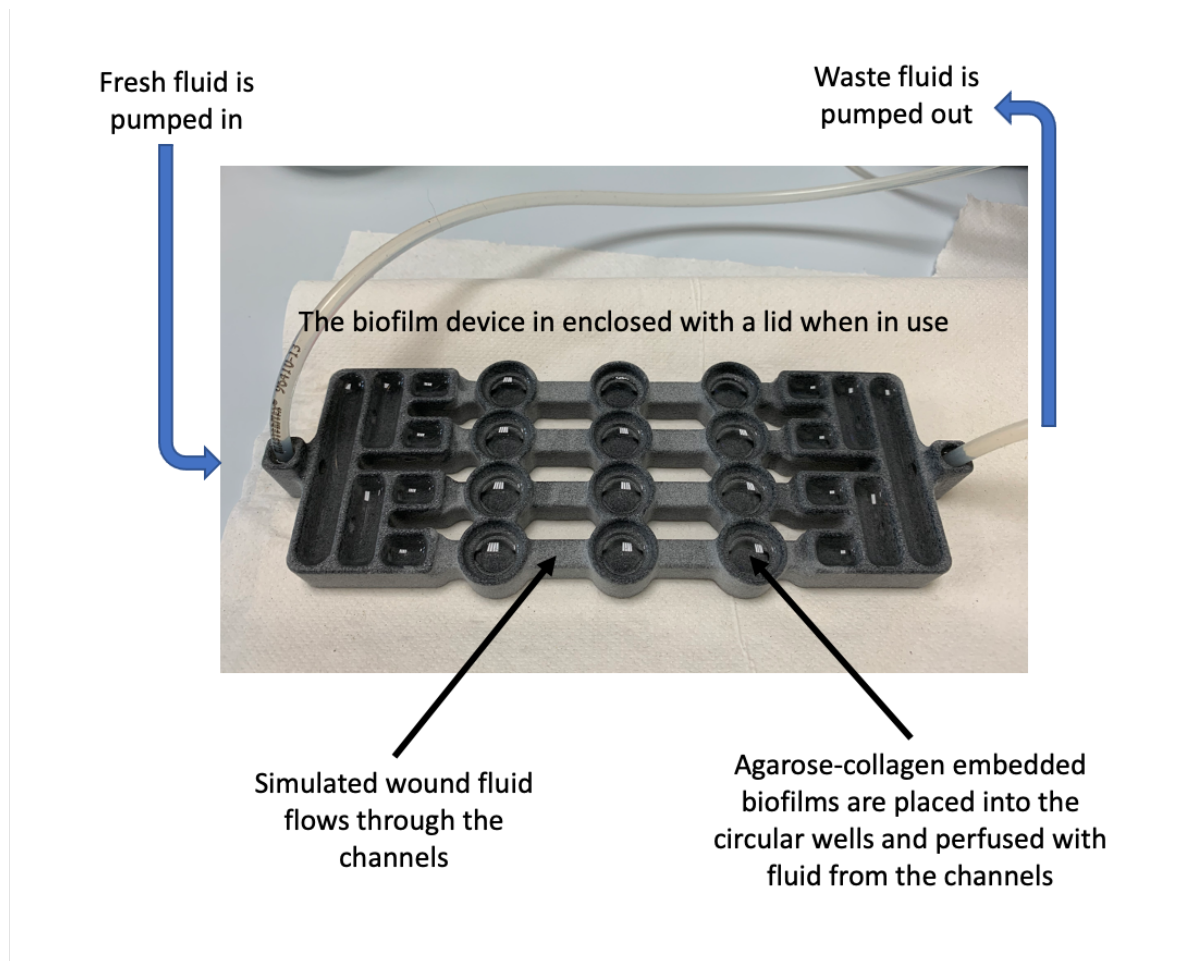

**Figure S3.** Biofilm flow device when prepared for mixed-species biofilm growth under flow, using biofilms embedded in an agarose-collagen matrix.
